# Supplementary material
Source: PubMed Central journal article supplement (PMC2792924)

# European Journal of Immunology

**Supporting Information**

**for**

**DOI 10.1002/eji.200838920**

**Adult BM generates CD5<sup>+</sup> B1 cells containing abundant N-region additions**

Nichol E. Holodick, Karen Repetny, Xuemei Zhong  
and Thomas L. Rothstein

## Supplementary Figures and Legends

**Supplementary Figure 1.** Peritoneal washout cells and spleen cells were obtained from chimeric adoptive hosts 12 weeks following lethal irradiation and rescue by administration of MSCV.GFP-infected (lin<sup>-</sup>) adult bone marrow, immunofluorescently stained, and sorted for GFP+CD5<sup>+</sup> peritoneal B1 (B220<sup>lo</sup>CD5<sup>+</sup>) and GFP<sup>+</sup> splenic B2 (B220<sup>+</sup>CD5<sup>-</sup>) cells. Peritoneal washout cells and spleen cells were obtained from control wild-type (WT) BALB/c mice, immunofluorescently stained, and sorted for CD5<sup>+</sup> B1 and for B2 cells. B cells were immediately seeded onto plates coated with anti-mouse Ig, incubated for 3 hours, and developed with alkaline phosphatase-conjugated goat anti-mouse IgM. Results of a representative experiment are shown.

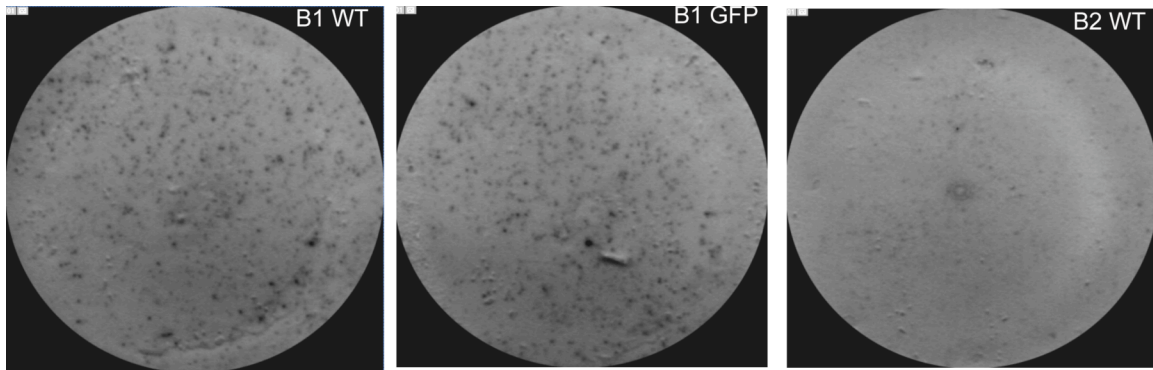

**Supplementary Figure 2.** Sequence data for native B1a cells (B1 WT), native B2 cells (B2 WT), bone marrow derived B1a cells (B1 GFP), and bone marrow derived B2 cells (B2 GFP) are listed. See Materials and Methods section 4.8 for the PCR and sequencing methods followed.

**B1 WT (n = 56)**

| Input   | V name        | 3'V-REGION      | N1              | P  | D-REGION                | N2     | P  | 5'J-REGION               | J name   | D name      |
|---------|---------------|-----------------|-----------------|----|-------------------------|--------|----|--------------------------|----------|-------------|
| A2-117  | IGHV2-3*01    | tgtgcca....     |                 |    | .....ggtagc.....        |        |    | attactatgctatggactactgg  | IGHJ4*01 | IGHD2-14*01 |
| A4-116  | IGHV2-9-1*01  | tgtgccagag.     |                 |    | tctactatggt.....        |        |    | ....tatgctatggactactgg   | IGHJ4*01 | IGHD2-2*01  |
| A5-116  | IGHV2-4*02    | tgtgccagaaa     |                 |    | .....tggtaa....         |        |    | ctactggctacttcgatgtctgg  | IGHJ1*01 | IGHD2-1*01  |
| A6-116  | IGHV1-7*01    | tgtgcaag.       |                 |    | .ctactatggtaact..       |        |    | actactttgactactgg        | IGHJ2*01 | IGHD2-1*01  |
| A8-116  | IGHV7-3*02    | tgtgcaagagat.   |                 |    | .....tggta.....         |        |    | actactttgactactgg        | IGHJ2*01 | IGHD1-3*01  |
| A11-117 | IGHV5-6*01    | tgtgcaagaca     |                 |    | ...ttactacggtagtag....  |        |    | ...ctggctacttcgatgtctgg  | IGHJ1*01 | IGHD1-1*01  |
| A12-117 | IGHV3-1*02    | tgtgcaaga       |                 |    | ....ctggg..             |        |    | ctactggctacttcgatgtctgg  | IGHJ1*01 | IGHD4-1*01  |
| B2-117  | IGHV2-2*02    | tgtgccagaaa     |                 |    | ....ctatggtaac...       |        |    | ..tactatgctatggactactgg  | IGHJ4*01 | IGHD2-1*01  |
| B3-117  | IGHV3-1*02    | tgtgcaaga       |                 |    | ..tactatgta.....        |        |    | ...actttgactactgg        | IGHJ2*01 | IGHD2-1*01  |
| B4-117  | IGHV2-3*01    | tgtgccaacc      |                 |    | .....ggta.....          |        |    | ...actttgactactgg        | IGHJ2*01 | IGHD1-3*01  |
| B8-116  | IGHV2-9-1*01  | tgtgccaga..     |                 |    | ....ctgg...             |        |    | .....ttgactactgg         | IGHJ2*01 | IGHD4-1*01  |
| B10-117 | IGHV1-9*01    | tgtgcaaga       |                 |    | .....cctac              |        |    | ....gtttgctactgg         | IGHJ3*01 | IGHD5-1*01  |
| C2-117  | IGHV6-3*01    | tgtaccag.       |                 |    | .....accgc...           |        |    | .....gagtactgg           | IGHJ2*01 | IGHD1-2*01  |
| C3-116  | IGHV5-9-3*01  | tgtgcaagaca     |                 |    | ...ttactacggtagtagct..  |        |    | actactttgactactgg        | IGHJ2*01 | IGHD1-1*01  |
| C3-117  | IGHV1-7*01    | tgtgcaaga       |                 |    | ..tactatgatta....       |        |    | .....tgctactgg           | IGHJ3*01 | IGHD2-4*01  |
| C5-116  | IGHV5-17*02   | tgtgcaaga       |                 |    | .....tggttactac         |        |    | attactatgctatggactactgg  | IGHJ4*01 | IGHD2-3*01  |
| C5-117  | IGHV6-6*02    | tgtaccagg       |                 |    | cctggta.....            |        |    | ...actatgctatggactactgg  | IGHJ4*01 | IGHD2-11*01 |
| C6-117  | IGHV2-9-1*01  | tgtgccaga..     |                 |    | .....tatgattacg..       |        |    | ...actatgctatggactactgg  | IGHJ4*01 | IGHD2-4*01  |
| C7-116  | IGHV1-37*01   | tgtggaa..       |                 |    | tttattactacggtagtag.... |        |    | ....ctatgctatggactactgg  | IGHJ4*01 | IGHD1-1*01  |
| C9-116  | IGHV5-12*02   | tgtgcaagaca     |                 |    | ....gtatggtaac...       |        |    | ..tactatgctatggactactgg  | IGHJ4*01 | IGHD2-11*01 |
| D1-116  | IGHV7-1*02    | tgtgcaagagatg.. |                 |    | .....attacg..           |        |    | ...actggctacttcgatgtctgg | IGHJ1*01 | IGHD2-4*01  |
| D4-116  | IGHV14-3*02   | tgtgcta..       |                 |    | ..tgggta..              |        |    | cctggtttgctactgg         | IGHJ3*01 | IGHD4-1*01  |
| D5-116  | IGHV5-6-2*01  | tgtgcaagaca     |                 |    | ...ttactacggtagtag....  |        |    | .ctactttgactactgg        | IGHJ2*01 | IGHD1-1*01  |
| D7-116  | IGHV2-9-1*01  | tgtgcca....     |                 |    | cctactatggtaac...       |        |    | ..tactatgctatggactactgg  | IGHJ4*01 | IGHD2-10*01 |
| D8-116  | IGHV7-3*02    | tgtgcaagagat.   |                 |    | ..tattactacggtagtagcta. |        |    | .ctggtttgctactgg         | IGHJ3*01 | IGHD1-1*01  |
| D9-116  | IGHV5S12*01   | tg.....         |                 |    | .....ctacggtagtagc...   |        |    | .....ttgctactgg          | IGHJ3*01 | IGHD1-1*01  |
| A1-117  | IGHV3-2*02    | tgtgcaaga       | gagggaa         |    | ...actatggttacg..       |        |    | ...actatgctatggactactgg  | IGHJ4*01 | IGHD2-2*01  |
| A11-116 | IGHV5-6-3*01  | tgtgcaagag.     | t               |    | ....ctggg..             |        |    | .....atgctatggactactgg   | IGHJ4*01 | IGHD4-1*01  |
| B3-116  | IGHV1-18*01   | tgtgcaaga       | tgg             |    | .....tatggttacg..       |        |    | ...actatgctatggactactgg  | IGHJ4*01 | IGHD2-2*01  |
| B4-116  | IGHV5-17*02   | tgtgcaaga       | gggggccaatggcca |    | ..tattactacggtagtag.... |        |    | ctactggctacttcgatgtctgg  | IGHJ1*01 | IGHD1-1*01  |
| B5-116  | IGHV5-6-4*01  | tgtacaagag.     | ggggg           |    | .....acggt.....         |        |    | ....gtttgctactgg         | IGHJ3*01 | IGHD1-1*01  |
| B7-116  | IGHV1-74*01   | tgtgcaa..       | gataccc         |    | ctactataggtagc.....     |        |    | actactttgactactgg        | IGHJ2*01 | IGHD2-14*01 |
| C2-116  | IGHV3-2*02    | tgtgca...       | c               |    | ...actatggtaa....       |        |    | ctcccggctacttcgatgtctgg  | IGHJ1*01 | IGHD2-1*01  |
| C4-116  | IGHV10S3*01   | tgtgtgaga..     | c               |    | ....actggg..            |        |    | ...actttgactactgg        | IGHJ2*01 | IGHD4-1*01  |
| C7-117  | IGHV1-74*01   | tgtgcaa..       | g               |    | .....tgattacg..         |        |    | ...actatgctatggactactgg  | IGHJ4*01 | IGHD2-4*01  |
| C8-116  | IGHV5-9-2*01  | tgtgcaa....     | nag             |    | ctaactgggac             |        |    | .....gctatggactactgg     | IGHJ4*01 | IGHD4-1*01  |
| C12-116 | IGHV1-18*01   | tgtgcaaga       | t               |    | .....taggtggttcgg.      |        |    | cctggttgctactgg          | IGHJ3*01 | IGHD2-14*01 |
| A2-116  | IGHV1-74*01   | tgtgcaa..       | gacc            |    | ...ctataggtacgagc..     | acggat |    | attactatgctatggactactgg  | IGHJ4*01 | IGHD2-14*01 |
| A5-117  | IGHV3-2*02    | tgtgcaaga       |                 |    | .....tggagg.....        | gg     |    | .ctactttgactactgg        | IGHJ2*01 | IGHD1-1*02  |
| A9-116  | IGHV14-2*02   | tgtgctaga       | agg             |    | .ctactatgg.....         | na     |    | .....atgctatggactactgg   | IGHJ4*01 | IGHD2-2*01  |
| A10-117 | IGHV2-9-1*01  | tgtgccaga..     | ca              |    | gggac.....              | cgg    |    | ...ggtttgctactgg         | IGHJ3*01 | IGHD3-3*01  |
| B5-117  | IGHV1-14*01   | tgtgcaag.       |                 |    | ggga.....               | g      |    | ...actatgctatggactactgg  | IGHJ4*01 | IGHD3-3*01  |
| B6-117  | IGHV1-14*01   | tgtgcaa..       |                 |    | ...attactacggtag.....   | at     |    | cctggttgctactgg          | IGHJ3*01 | IGHD1-1*01  |
| B11-117 | IGHV11-1*01   | tgtatganata     | ta              |    | .....atgattacg..        | g      |    | ...ctggctacttcnatgtctgg  | IGHJ1*01 | IGHD2-4*01  |
| C8-117  | IGHV1-47*01   | tgtgcaa..       | caa             |    | ....tatggtaac...        | c      |    | ....ctttgactactgg        | IGHJ2*01 | IGHD2-1*01  |
| D6-116  | IGHV3-6*02    | tgtgcaagag.     | ct              |    | ....tatggtaac...        | cc     |    | ....ctatgctatggactactgg  | IGHJ4*01 | IGHD2-1*01  |
| A7-117  | IGHV6-6*01    | tgtacca..       |                 |    | .....tgattacgac         |        | gt | actactttgactactgg        | IGHJ2*01 | IGHD2-4*01  |
| C11-116 | IGHV3-2*02    | tgtgcaaga       |                 |    | tttattactacggtagtagctac |        | gt | actactttgactactgg        | IGHJ2*01 | IGHD1-1*01  |
| A9-117  | IGHV1-63*02   | tgtgcaaga       |                 | t  | tttattactacggtagtag.... |        |    | ....ctatgctatggactactgg  | IGHJ4*01 | IGHD1-1*01  |
| D11-116 | IGHV5-12-2*01 | tgtgcaagaca     |                 | ga | tctactatgat.....        |        |    | .....tacgctatggactactgg  | IGHJ4*01 | IGHD2-4*01  |
| B2-116  | IGHV9-3-1*01  | tgtgcaa..       |                 |    | .....atgattacgac        | gg     | gg | cctggttgctactgg          | IGHJ3*01 | IGHD2-4*01  |
| B9-116  | IGHV2-9-1*01  | tgtgccagag.     | gggg            | a  | tttattactacggtagtagc... | gg     |    | attactatgctatggactactgg  | IGHJ4*01 | IGHD1-1*01  |
| B10-116 | IGHV5S12*01   | tgtgcaag.       | tgg             |    |                         |        |    | .ttactatgctatggactactgg  | IGHJ4*01 |             |
| C4-117  | IGHV2-9-1*01  | tgtgccagaga     | cc              |    | tttattactacggtagtag.... |        |    | ....ctatgctatggactactgg  | IGHJ4*01 | IGHD1-1*01  |
| C9-117  | IGHV2-9-1*01  | tgtgccagaga     | tgggg           |    | .....ggttactac          | gta    |    | ...actatgctatggactactgg  | IGHJ4*01 | IGHD2-3*01  |
| C1-116  | IGHV7-3*02    | tgtgcaagagat.   |                 |    | .....ggtaact..          |        |    | actactttgactactgg        | IGHJ2*01 | IGHD2-1*01  |

## B2 WT (n = 38)

| Input   | V name       | 3'V-REGION      | N1          | P   | D-REGION                | N2            | P  | 5'J-REGION              | J name   | D name      |
|---------|--------------|-----------------|-------------|-----|-------------------------|---------------|----|-------------------------|----------|-------------|
| D3-130  | IGHV1-12*01  | tgtgcaaga       | ggggaaa     |     | ...acggctacggc...       |               |    | .....gctatggactactgg    | IGHJ4*01 | IGHD3-3*01  |
| C3-127  | IGHV11-2*02  | tgatgagata      |             |     | ....tगतggtta....        |               |    | ctactggctactcgatgtctgg  | IGHJ1*01 | IGHD2-3*01  |
| C11-127 | IGHV1-18*01  | tgtgcaaga       | ggagg       | gg  | cctactatggtaa....       | aactgggacggga |    | .....gctatggactactgg    | IGHJ4*01 | IGHD2-10*01 |
| A1-130  | IGHV1-18*01  | tgtgca...       | cg          |     | .....gggc....           | g             |    | attactatgctatggactactgg | IGHJ4*01 | IGHD3-3*01  |
| A7-127  | IGHV1-26*01  | tgtgcaaga       | gaggg       |     | ...ctataggtacgacg..     | tgagga        |    | cctggtttgctactactgg     | IGHJ3*01 | IGHD2-14*01 |
| B12-127 | IGHV1-26*01  | tgtgcaaga       | agg         |     | .....actacggta.....     | aaggggg       |    | ..actggctactcgatgtctgg  | IGHJ1*01 | IGHD1-1*01  |
| A4-130  | IGHV1-39*01  | tgtgcaa..       |             |     | ....ctgggac             | gagg          |    | .....gctatggactactgg    | IGHJ4*01 | IGHD4-1*01  |
| C8-130  | IGHV14-3*02  | tgtgctaga       | ccaggg      |     | .....ggttacgac          | ggt           |    | .....ttgctactactgg      | IGHJ3*01 | IGHD2-2*01  |
| C4-127  | IGHV14-4*02  | tgtaatgc.       | c           |     | .ttttacgacg.....        | at            |    | attactatgctatggactactgg | IGHJ4*01 | IGHD1-1*01  |
| A10-127 | IGHV1-5*01   | tgtacaaga       | tg          |     | .....gattacga.          | g             |    | ....ctatgctatggactactgg | IGHJ4*01 | IGHD2-4*01  |
| B9-130  | IGHV1-55*01  | tgtgcaaga       | gagggggctt  |     | .....tacgaggg.          | ggt           |    | ..tacttgactactgg        | IGHJ2*01 | IGHD2-14*01 |
| B9-127  | IGHV1-63*02  | tgtgcaaga       | ttcgg       |     | ...attacgcccg.....      | ga            |    | .ctggttgctactactgg      | IGHJ3*01 | IGHD1-1*01  |
| A8-127  | IGHV1-69*02  | tgtacaaga       | gaggggag    |     | ....tactacggctac        |               |    | ....gtttgctactactgg     | IGHJ3*01 | IGHD1-2*01  |
| B7-130  | IGHV1-7*01   | tgtgcaaga       | tccgagggg   |     | ..tattactacggt.....     | g             |    | cctggttgctactactgg      | IGHJ3*01 | IGHD1-1*01  |
| B6-127  | IGHV1-74*01  | tgtgcaa..       | gcc         | aga | tctactatgatt....        | cct           |    | .....tggactactgg        | IGHJ4*01 | IGHD2-4*01  |
| B10-130 | IGHV1-82*01  | tgtgcaaga       | tc          |     | .....agggattactca       | cggt          |    | ..tggttgctactactgg      | IGHJ3*01 | IGHD1-3*01  |
| D4-127  | IGHV1-9*01   | tgtgcaaga       | ccc         |     | ..tattactacggtagtagctac | g             |    | ...actatgctatggactactgg | IGHJ4*01 | IGHD1-1*01  |
| D8-130  | IGHV1-9*01   | tgtgca...       | g           |     | .....ggtacgacg..        | aggt          |    | ....ctatgctatggactactgg | IGHJ4*01 | IGHD2-14*01 |
| A9-130  | IGHV1S53*01  | tgtgca...       | ccg         |     | cctactatggtaact..       | gtc           |    | ..actggctactcgatgtctgg  | IGHJ1*01 | IGHD2-10*01 |
| C12-127 | IGHV2-6-1*01 | tgtgccaga..     | gaaaggagt   |     | .gacagctcgggctac        | t             |    | cctggttgctactactgg      | IGHJ3*01 | IGHD3-2*01  |
| D5-127  | IGHV2-6-7*01 | tgtgccagaga     | ta          |     | .....atgattacgac        | ggg           |    | ..tggttgctactactgg      | IGHJ3*01 | IGHD2-4*01  |
| B1-130  | IGHV2-6-7*01 | tgtgccagaga     | tccc        |     | ..tattactacggtag.....   |               |    | .....tatggactactgg      | IGHJ4*01 | IGHD1-1*01  |
| A6-127  | IGHV2-9-1*01 | tgtgccagaga     | taagag      |     | ....gtatgtaactac        | ggg           |    | ..tactatgctatggactactgg | IGHJ4*01 | IGHD2-11*01 |
| B1-127  | IGHV3-1*02   | tgtgcaag.       | ga          |     | ....tactacggctac        | c             |    | ....ctatgctatggactactgg | IGHJ4*01 | IGHD1-2*01  |
| D3-127  | IGHV3-2*02   | tgtgcaaga       | gatggag     |     | ...attactacggtagtagctac | c             |    | cctggttgctactactgg      | IGHJ3*01 | IGHD1-1*01  |
| D9-130  | IGHV3-6*02   | tgtgcaag...     | gggggg      |     | .taaccggg..             |               |    | ...ggttgctactactgg      | IGHJ3*01 | IGHD4-1*01  |
| B2-130  | IGHV3-8*02   | tgtgcaaga..     | g           |     | ....tactacggctac        | c             |    | ctactggctactcgatgtctgg  | IGHJ1*01 | IGHD1-2*01  |
| B8-127  | IGHV4-1*02   | tgtgcaaga..     | gggag       |     | ....ctatgtaactac        | ga            |    | ..ctggttgctactactgg     | IGHJ3*01 | IGHD2-1*01  |
| B11-127 | IGHV5-4*02   | tgtgcaaga..     | cggc        |     | ....tactacgg.....       | g             |    | ...actatgctatggactactgg | IGHJ4*01 | IGHD1-1*01  |
| B3-130  | IGHV5-6*01   | tgtgcaagaca     | tga         |     | ....gaggattactac        | ga            |    | .....ctatggactactgg     | IGHJ4*01 | IGHD2-3*01  |
| B6-130  | IGHV5-6-2*01 | tgtgcaaga..     | ga          |     | tctacga.....            | gaagg         |    | .....tatggactactgg      | IGHJ4*01 | IGHD2-3*01  |
| C1-127  | IGHV5-6-3*01 | tgtgcaagcga     |             |     | .....tggttact..         | g             |    | ....ctatgctatggactactgg | IGHJ4*01 | IGHD2-3*01  |
| A3-127  | IGHV5-6-4*01 | tgtac.....      | t           |     | tctactatgatta....       | ggggg         |    | ..tggttgctactactgg      | IGHJ3*01 | IGHD2-4*01  |
| C2-130  | IGHV5-9-1*01 | tgtgcaaga       | cattgtaacca |     | .....atggttac...        | c             |    | cttctggctactcgatgtctgg  | IGHJ1*01 | IGHD2-3*01  |
| B3-127  | IGHV6-6*01   | tgtacaagg       |             |     | .....ggta.....          |               |    | ...acttgactactactgg     | IGHJ2*01 | IGHD1-3*01  |
| C7-127  | IGHV6-6*02   | tgtac....       | gg          |     | cctactatggt.....        | c             |    | .....ttgactactactgg     | IGHJ2*01 | IGHD2-9*01  |
| A4-127  | IGHV7-1*02   | tgtgcaagagat... |             |     | .....tacggctac          | ccc           |    | ....ttgctactactgg       | IGHJ3*01 | IGHD1-2*01  |
| D7-127  | IGHV7-3*02   | tgtgcaagggat.   |             |     | ....gatggttactac        | tt            | gg | cctggttgctactactgg      | IGHJ3*01 | IGHD2-3*01  |

## B1 GFP+ (n = 30)

| Input   | V name       | 3'V-REGION    | p | N1          | P   | D-REGION                | N2        | P   | 5'J-REGION              | J name   | D name      |
|---------|--------------|---------------|---|-------------|-----|-------------------------|-----------|-----|-------------------------|----------|-------------|
| D11-119 | IGHV10-1*02  | tgtgtga....   |   | ctt         |     | .....ctgagg....         |           |     | cctggtttgcttactgg       | IGHJ3*01 | IGHD3-2*02  |
| A3-119  | IGHV10S3*01  | tgtgtga....   |   |             |     | ...aggatgagaact..       | ggtgg     |     | .....gctatggactactgg    | IGHJ4*01 | IGHD2-11*01 |
| D8-119  | IGHV1-14*01  | tgtgcaaga     |   | tccgg       |     | .....ctacggtagtag....   |           |     | ctactggacttcgatgtctgg   | IGHJ1*01 | IGHD1-1*01  |
| D12-119 | IGHV1-14*01  | tgtgcaaga     |   |             |     | ctaact.....             |           |     | .....tttgcttactgg       | IGHJ3*01 | IGHD4-1*01  |
| A4-118  | IGHV1-15*01  | tgtacaaga     |   | aggggc      | aga | tctactatgattacgac       | agggg     |     | cctggtttgcttactgg       | IGHJ3*01 | IGHD2-4*01  |
| B3-119  | IGHV1-18*01  | tgtgcaaga     |   | a           |     | gaagaact..              | t         |     | actactttgactactgg       | IGHJ2*01 | IGHD5-2*01  |
| C8-119  | IGHV1-18*01  | tgtg.....     |   | gc          |     | .....tactacggtagtagcta. | tgg       |     | .....ggactactgg         | IGHJ4*01 | IGHD1-1*01  |
| A12-119 | IGHV1-26*01  | tgtgcaag.     |   | g           |     | ..tattactacggtagtagctac |           |     | .....gactactgg          | IGHJ2*01 | IGHD1-1*01  |
| C10-118 | IGHV1-37*01  | tgtgc....     |   |             |     | .....ctacggtagt.....    | t         |     | cctggtttgcttactgg       | IGHJ3*01 | IGHD1-1*01  |
| D2-119  | IGHV1-4*01   | tgtgcaaga     |   |             |     | .....tgggga....         | ttncngggg |     | .....tttgactncngg       | IGHJ2*01 | IGHD2-13*01 |
| A11-118 | IGHV1-7*01   | tgtgcaaga     |   | gt          |     | .....ggctg..            | g         |     | .ctactttgactactgg       | IGHJ2*01 | IGHD3-3*01  |
| B5-118  | IGHV1-74*01  | tgtgc....     |   | ctcgggccccg |     | .....gatggttac...       | gg        |     | ....ctatgctatggactactgg | IGHJ4*01 | IGHD2-3*01  |
| D2-118  | IGHV1-82*01  | tgtgcaaga     |   | gaatt       |     | .....tacttacg..         | gtg       |     | ...ggttgcttactgg        | IGHJ3*01 | IGHD2-12*01 |
| A2-119  | IGHV1-9*01   | tgtgcaaga     |   | tcggga      |     | ..aactggga.             |           | a   | .....tttgcttactgg       | IGHJ3*01 | IGHD4-1*01  |
| C12-118 | IGHV1S16*01  | tgtacaa..     |   | gagagg      |     | .....gattac...          | c         |     | ....ctatgctatggactactgg | IGHJ4*01 | IGHD2-4*01  |
| C5-119  | IGHV1S45*01  | tgtgcaaga     |   | gg          |     | .....ggatccg..          | t         |     | actactttgactactgg       | IGHJ2*01 | IGHD2-2*01  |
| A7-118  | IGHV2-6*02   | tgtgccaga..   |   |             |     | .....gctg..             | a         |     | ....gtttgcttactgg       | IGHJ3*01 | IGHD3-3*01  |
| D6-118  | IGHV2-6-4*01 | tgtgccagaaa   |   | aggg        |     | ..aactgg...             |           |     | ..tactttgactactgg       | IGHJ2*01 | IGHD4-1*01  |
| C2-118  | IGHV2-6-7*01 | tgtgccagaga   |   |             |     | tagaggacta.....         | g         |     | cctggtttgcttactgg       | IGHJ3*01 | IGHD1-3*01  |
| A1-118  | IGHV3-2*02   | tgtgcaaga     |   | g           |     | ...attactacggtagtagctac | a         | agt | actactttgactactgg       | IGHJ2*01 | IGHD1-1*01  |
| A12-118 | IGHV3-5*02   | tgtgcacg...   |   |             |     | .....gttacta.           | a         |     | ....ggtacttcgatgtctgg   | IGHJ1*01 | IGHD2-3*01  |
| B6-118  | IGHV5-6-3*01 | tgtgcaagaga   |   | tagggca     |     | ..tattactacggtagtagctac | gtagag    |     | ..tactttgactactgg       | IGHJ2*01 | IGHD1-1*01  |
| C1-119  | IGHV5-6-3*01 | tgtgcaagaga   |   |             |     | .....tggtt.....         |           |     | actactttgactactgg       | IGHJ2*01 | IGHD2-3*01  |
| D10-119 | IGHV5S12*01  | tgtgcaaga     | t | gg          | c   | gggac.....              | ggg       |     | ....tatgctatggactactgg  | IGHJ4*01 | IGHD3-3*01  |
| C10-119 | IGHV6-6*01   | tgtaccag.     |   | tcc         |     | .ctatgat.....           | actc      |     | .....ggtacttcgatgtctgg  | IGHJ1*01 | IGHD2-3*01  |
| D3-118  | IGHV6-6*01   | tgtaccagg     |   | a           |     | ....gatggt.....         |           |     | actactttgactactgg       | IGHJ2*01 | IGHD2-3*01  |
| B2-119  | IGHV6-6*02   | tgtacc...     |   | t           |     | cctactatggtact..        |           |     | attactatgctatggactactgg | IGHJ4*01 | IGHD2-10*01 |
| C7-118  | IGHV6-6*02   | tgtaccagg     |   |             |     | .....ggta.....          |           |     | cccggttgcttactgg        | IGHJ3*01 | IGHD1-3*01  |
| D4-118  | IGHV6-6*02   | tgtaccag.     |   |             |     | .....tggg.....          |           |     | ..tactttgactactgg       | IGHJ2*01 | IGHD1-3*01  |
| B10-118 | IGHV7-3*02   | tgnngaaga.... |   | n           |     | .....atgga.....         |           |     | actactttgactactgn       | IGHJ2*01 | IGHD2-1*01  |

## B2 GFP+ (n = 29)

| Input   | V name       | 3'V-REGION    | P  | N1             | P | D-REGION                | N2       | 5'J-REGION              | J name   | D name      |
|---------|--------------|---------------|----|----------------|---|-------------------------|----------|-------------------------|----------|-------------|
| A5-129  | IGHV1-14*01  | tgtgcaaga     |    | cggg           |   | .....actacggctac        | cc       | ....ctatgctatggactactgg | IGHJ4*01 | IGHD1-2*01  |
| A7-128  | IGHV1-15*01  | tgtacaaga     |    |                |   | .....ggtagtag....       |          | ctactggacttcgatgtctgg   | IGHJ1*01 | IGHD1-1*01  |
| C7-128  | IGHV1-18*01  | tgtgcaaga     |    | aa             |   | ....taagattac...        | ttc      | .ctactttgactactgg       | IGHJ2*01 | IGHD2-4*01  |
| C6-128  | IGHV1-26*01  | tgtgcaaga     |    | ccgggc         |   | tctactttgatt.....       | cca      | ....tttgctactgg         | IGHJ3*01 | IGHD2-4*01  |
| C10-129 | IGHV1-47*01  | tgtgcaag.     |    | aggaggg        |   | tttattactacggtagtagctac | gttcc    | ....gttgctactgg         | IGHJ3*01 | IGHD1-1*01  |
| B9-128  | IGHV1-54*01  | tgtgcaaga     |    | g              |   | ..actataggtacgacgg.     | ga       | ...actatgctatggactactgg | IGHJ4*01 | IGHD2-14*01 |
| D9-128  | IGHV1-7*01   | tgtgcaaga     |    | ag             |   | .....tggtaacactac       | gtagg    | ...ctggtacttcgatgtctgg  | IGHJ1*01 | IGHD2-1*01  |
| A10-128 | IGHV1-80*01  | tgtgc....     |    | gcgact         |   | .taactggg..             |          | ...ggtttgcttattgg       | IGHJ3*01 | IGHD4-1*01  |
| D10-128 | IGHV1-82*01  | tgtgcaaga     |    |                |   | .....agcctc.....        | catggttc | .ctactttgactactgg       | IGHJ2*01 | IGHD1-1*01  |
| B2-128  | IGHV1S16*01  | tgtacaa..     |    | ga             |   | caactggga.              | tgggg    | ....ctttgactactgg       | IGHJ2*01 | IGHD4-1*02  |
| A12-128 | IGHV1S40*01  | tgtgcaaga     |    | gaga           |   | .ggagggatagg.....       | ttcc     | ..actggtatttcgatgtctgg  | IGHJ1*01 | IGHD3-3*01  |
| D4-129  | IGHV2-3*01   | tgtgccaaa..   |    | gg             |   | .....gggata.            | tgccccc  | .....gcttactgg          | IGHJ3*01 | IGHD3-2*01  |
| C8-128  | IGHV2-4*02   | tgtgccaga..   |    | gagggggc       |   | ....tgatggttactac       | gaggggg  | attactatgctatggactactgg | IGHJ4*01 | IGHD2-3*01  |
| D1-129  | IGHV2-4*02   | tgtgccagaaa   |    | taggg          |   | .....aactgaag.....      | c        | .....actcgaatgtctgg     | IGHJ1*01 | IGHD1-3*01  |
| D11-128 | IGHV2-4-1*01 | tgtgccagaaa   |    | ttggg          |   | .....aggctac            | gtggg    | ...ggtttgcttactgg       | IGHJ3*01 | IGHD3-2*02  |
| A8-128  | IGHV2-6*03   | tgtgccaga     |    | catgg          |   | ..aactgggac             | gg       | .....atgctatggactactgg  | IGHJ4*01 | IGHD4-1*01  |
| C8-129  | IGHV2-6-7*01 | tgtgccagag.   | g  | ag             |   | ctaactgggac             | gtaa     | ..actggtacttcgatgtctgg  | IGHJ1*01 | IGHD4-1*01  |
| B4-128  | IGHV3-1*02   | tgtgcaaga     |    | gga            |   | .ctactacggtt.....       |          | .ttactatgcttggactactgg  | IGHJ4*01 | IGHD2-2*01  |
| B5-129  | IGHV3-1*02   | tgtgcaaga     |    | gaagtacttcgatt |   | ....ttactatg.....       | ccg      | .....tggaacttctgg       | IGHJ4*01 | IGHD1-1*02  |
| A5-128  | IGHV3-2*02   | tgtgcaaga     |    | tcgaggg        |   | .....atggtaacactac      | ggt      | .....ttgactactgg        | IGHJ2*01 | IGHD2-1*01  |
| C1-128  | IGHV3-2*02   | tgtgcaa..     |    | cc             | a | tctatgatggttctct..      |          | attactatgctatggactactgg | IGHJ4*01 | IGHD2-3*01  |
| A1-129  | IGHV3-6*02   | tgtgcaag...   |    | g              |   | .ggcggc.....            | g        | ..actggtacttcgatgtctgg  | IGHJ1*01 | IGHD2-2*01  |
| C2-128  | IGHV5-17*02  | tgtgcaaga     | tc | a              | a | tctatgatggta...         |          | .ctggtttgcttactgg       | IGHJ3*01 | IGHD2-3*01  |
| B1-128  | IGHV5-6-4*01 | tgtacaagag.   |    | gacc           |   | ....ctgg...             |          | .....gactactgg          | IGHJ2*01 | IGHD4-1*01  |
| C12-128 | IGHV6-6*01   | tgtacc...     |    | c              |   | .....ccccaa..           | attt     | .ttactatgctatggactactgg | IGHJ4*01 | IGHD6-1*01  |
| A3-128  | IGHV6-6*02   | tgtaccagg     |    | g              |   | .....actacggtagtagctac  | gt       | ...ctggtacttcgatgtctgg  | IGHJ1*01 | IGHD1-1*01  |
| C10-128 | IGHV7-3*02   | tgtgcaagaga.. |    |                |   | .....aggg.....          | gga      | ....tatgctatggactactgg  | IGHJ4*01 | IGHD3-3*01  |
| D4-128  | IGHV7-3*02   | tgtgcaagagat. |    | tcgg           |   | .....atagt.....         | c        | .....ttgactactgg        | IGHJ2*01 | IGHD3-1*01  |
| B3-129  | IGHV5-6-4*01 | tgtacaagag.   |    | g              |   | ...aactcgg.....         |          | .....gactactgg          | IGHJ2*01 | IGHD2-2*01  |

**Supplementary Figure 3.** PCR products are displayed for amplified  $\beta 2$  microglobulin (Lane 1), Elfin (Lane 2), Annexin (Lane 3), Pax-5 (Lane 4), VH11 (Lane 5), and VH12 (Lane 6). PCR was performed as described in the Materials and Methods section 4.5. Afterwards, the products were run on a 2% agarose gel.

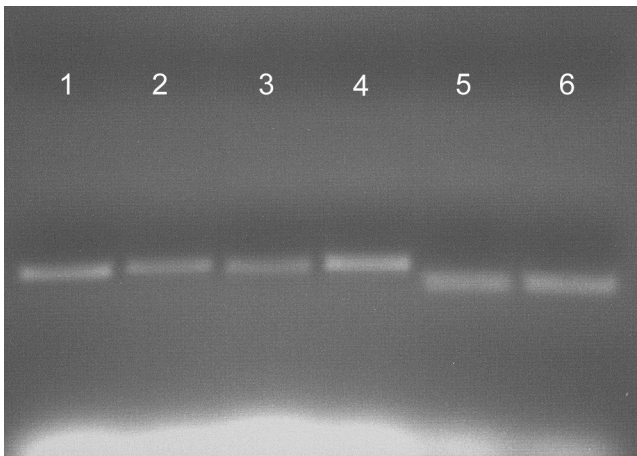

Supplement: NIHMS153561-supplement-Figures.pdf [file NIHMS153561-supplement-Figures.pdf]
